# Supplementary material for: Pre-treatment tumor neo-antigen responses in draining lymph nodes are infrequent but predict checkpoint blockade therapy outcome
Source: PubMed Central journal article supplement — Oncoimmunology. 2019 Nov 7;9(1):1684714. doi: 10.1080/2162402X.2019.1684714 (PMC6959436; doi:10.1080/2162402x.2019.1684714), 2019-11-07
Supplement: koni-09-01-1684714-s001.pdf [file koni-09-01-1684714-s001.pdf]

Supplementary table III: Long neo-antigen peptides

|   |               |                             |
|---|---------------|-----------------------------|
| 1 | <b>Uqcrc2</b> | EIGSQALAAGSYMAPSTVLQQIDSVAD |
| 2 | Ap3d1         | PVPFQLPPGVSNEPQFVFTIQSIVMAQ |
| 3 | Rpn1          | YILFFTVIIYVRLEFSITKDPAAEARM |
| 4 | Exosc5        | GSLACCLNAACMPLVDAGVPMRALFC  |
| 5 | Tmem161a      | VTVVSQYLTPLIFTLHCTLLLKTLGG  |
| 6 | Ganab         | VRWYQMGAYQPFQAHALDTGRREPW   |
| 7 | Mrpl28        | QAGAAEYRAYLEGECVEWLLRYLELG  |
| 8 | <b>Unc45a</b> | MTFPGERIYEVVRSLSLLHLSCSGLQ  |
| 9 | Zfp524        | DGPQGSQSKRAPHFCVCLRAFPLYSD  |

A.

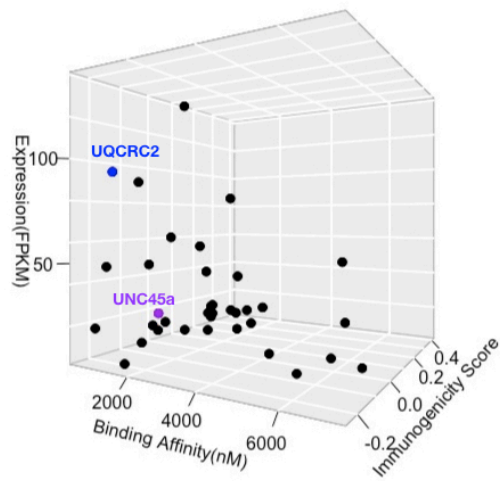

B.

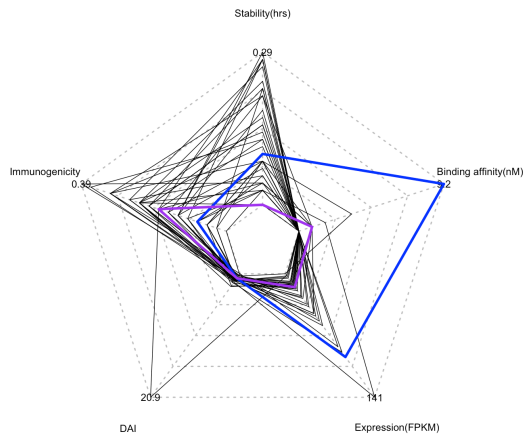

**Supplementary figure I. UQCRC2 and UNC45A predicted immunological factors. A.**

Expression levels (FPKM), Predicted binding affinity (nM) and Immunogenicity score of predicted neo-antigen candidates were plotted in a 3 dimensional plot. **B.** Expression levels (FPKM), Predicted binding affinity (nM), predicted MHC-peptide stability (hour), Immunogenicity score and differential agreotopicity index of predicted neo-antigen candidates were plotted in a spider plot in log scale. UQCRC2 is in blue and UNC45a is in purple.
